# Supplementary material for: Selective Binding and Redox-Activity on Parallel G-Quadruplexes by Pegylated Naphthalene Diimide-Copper Complexes
Source: MDPI journal article supplement (doi:10.3390/molecules26165025), 2021-08-19

# Selective Binding and Redox-Activity on Parallel G-Quadruplexes by Pegylated Naphthalene Diimide-Copper Complexes

Valentina Pirota <sup>1,2,\*</sup>, Enrico Lunghi <sup>1</sup>, Alessandra Benassi <sup>1,2</sup>, Emmanuele Crespan <sup>3</sup>, Mauro Freccero <sup>1</sup> and Filippo Doria <sup>1,\*</sup>

<sup>1</sup> Department of Chemistry, University of Pavia, via Taramelli 10, 27100 Pavia, Italy; enrico.lunghi01@universitadipavia.it (E.L.); alessandra.benassi01@universitadipavia.it (A.B.); mauro.freccero@unipv.it (M.F.)

<sup>2</sup> "G-Quadruplexes as INnovative ThERapeutiC Targets" (G4-INTERACT), Universal Scientific Education and Research Network (USERN), via Taramelli 10, 27100 Pavia, Italy

<sup>3</sup> Institute of Molecular Genetics IGM-CNR "Luigi Luca Cavalli-Sforza", via Abbiategrosso 207, 27100 Pavia, Italy; crespan@igm.cnr.it

\* Correspondence: valentina.pirota@unipv.it (V.P.); filippo.doria@unipv.it (F.D.)

| Table of Contents                                                                              | Page    |
|------------------------------------------------------------------------------------------------|---------|
| Oligonucleotide Sequences (Table S1)                                                           | S2      |
| Competition titration with TREN (Figure S1)                                                    | S2      |
| CD analysis of hTel22 after its folding in the presence of Cu(II)-NDI ligands (Table S2)       | S2      |
| CD spectra of hTel22 in presence of <b>NDI-Cu-DETA</b> (Figure S2) or <b>HP2Cu</b> (Figure S3) | S3      |
| Denaturing PAGE assay (Figure S4)                                                              | S4      |
| Molar absorption profiles of NDI-ligand/Cu(II) titration (Figure S5)                           | S5      |
| HPLC Purity Analysis                                                                           | S6      |
| ESI-MS Data                                                                                    | S7-S10  |
| <sup>1</sup> H-NMR and <sup>13</sup> C-NMR Characterization                                    | S11-S13 |

**Table S1.** Nucleic acid sequences used in the present studies.

| Name         | Nature | $\epsilon$ at 260 nm ( $\text{cm}^{-1}\text{M}^{-1}$ ) | Sequences (5'-3')          | Length         |
|--------------|--------|--------------------------------------------------------|----------------------------|----------------|
| TERRA        | RNA    | 237500                                                 | AGGGUUAGGGUUAGGGUUAGGG     | 22 nucleotides |
| hTel22       | DNA    | 228500                                                 | AGGGTTAGGGTTAGGGTTAGGG     | 22 nucleotides |
| 5'-FAM-TERRA | RNA    | 237500                                                 | FAM-AGGGUUAGGGUUAGGGUUAGGG | 22 nucleotides |

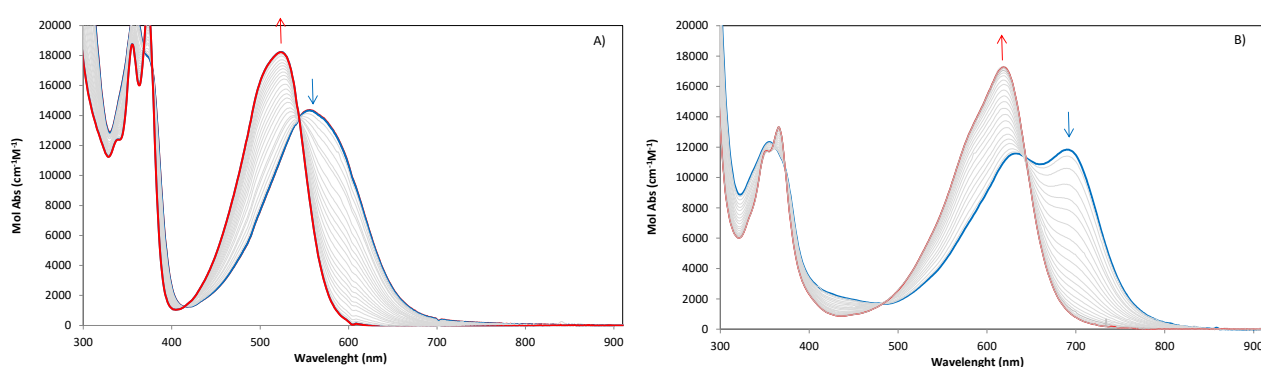

**Figure S1.** Uv-vis spectra taken upon titration of A) **HP2Cu** or B) **PE2Cu** (50  $\mu\text{M}$ ) with increasing equivalents of TREN (from 0 to 3 eq.) in 0.1 M HEPES buffer at pH 7.4, 25  $^{\circ}\text{C}$ .

**Table S2.** CD-melting experiment performed after the folding of hTel22 already in the presence of Cu(II)-NDIs.  $\Delta T_m$  values were measured by CD melting of 5  $\mu\text{M}$  oligonucleotides, in the presence of 10  $\mu\text{M}$  compounds, in 10 mM lithium cacodylate buffer (pH 7.4) with 100 mM or 10 mM KCl.

|                                             | $\lambda$ (nm) | Alone                        | HP2Cu                        |                                     | PE2Cu                        |                                     | NDI-Cu-DETA                  |                                     |
|---------------------------------------------|----------------|------------------------------|------------------------------|-------------------------------------|------------------------------|-------------------------------------|------------------------------|-------------------------------------|
|                                             |                | $T_m$ ( $^{\circ}\text{C}$ ) | $T_m$ ( $^{\circ}\text{C}$ ) | $\Delta T_m$ ( $^{\circ}\text{C}$ ) | $T_m$ ( $^{\circ}\text{C}$ ) | $\Delta T_m$ ( $^{\circ}\text{C}$ ) | $T_m$ ( $^{\circ}\text{C}$ ) | $\Delta T_m$ ( $^{\circ}\text{C}$ ) |
| hTel22<br>( $\text{K}^+ = 100 \text{ mM}$ ) | 290            | $78.24 \pm 0.06$             | $79.3 \pm 0.1$               | +1.1                                | $45 \pm 2$                   | - 33                                | $85.6 \pm 0.1$               | +7.4                                |
|                                             | 264            | $80.3 \pm 0.9$               | $84.5 \pm 0.3$               | +4.2                                | $> 90^{\circ}\text{C}$       | $> 11.64$                           | $> 90^{\circ}\text{C}$       | $> 11.64$                           |
| hTel22<br>( $\text{K}^+ = 10 \text{ mM}$ )  | 290            | $62.52 \pm 0.05$             | $67.0 \pm 0.5$               | +4.5                                | $36.4 \pm 0.1$               | - 26.1                              | $73.2 \pm 0.1$               | +10.7                               |
|                                             | 264            | $66.4 \pm 0.3$               | $78.8 \pm 0.2$               | +12.4                               | $> 90^{\circ}\text{C}$       | $> 23.6$                            | $84.7 \pm 0.5$               | +18.3                               |

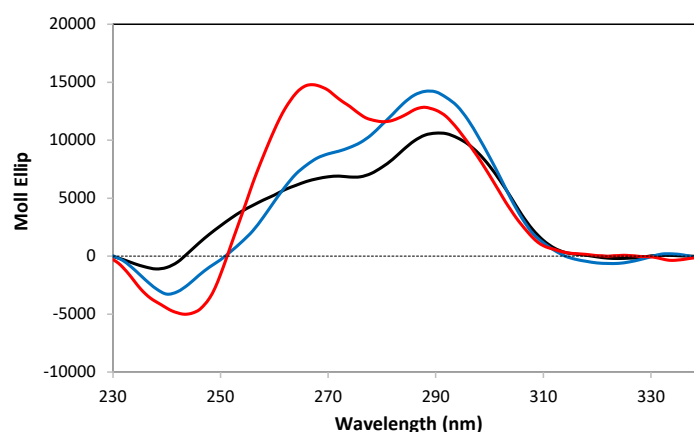

**Figure S2.** CD spectra of 5  $\mu$ M hTel22 alone (black line), after the addition of 2 eq. of **NDI-Cu-DETA**, left to equilibrate at room temperature for 16 h (blue line) and after the hTel22 G4 folding already in the presence of 2 eq. of **NDI-Cu-DETA** (red line) in 10 mM lithium cacodylate buffer at pH 7.4 with 100 mM KCl.

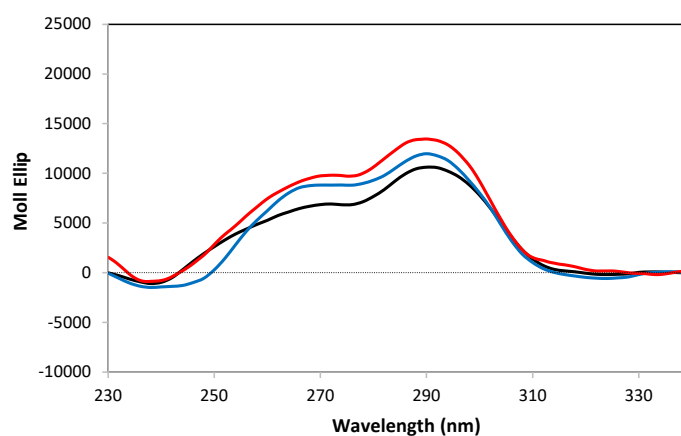

**Figure S3.** CD spectra of 5  $\mu$ M hTel22 alone (black line), after the addition of 2 eq. of **HP2Cu**, left to equilibrate at room temperature for 16 h (blue line) and after the hTel22 G4 folding already in the presence of 2 eq. of **HP2Cu** (red line) in 10 mM lithium cacodylate buffer at pH 7.4 with 100 mM KCl.

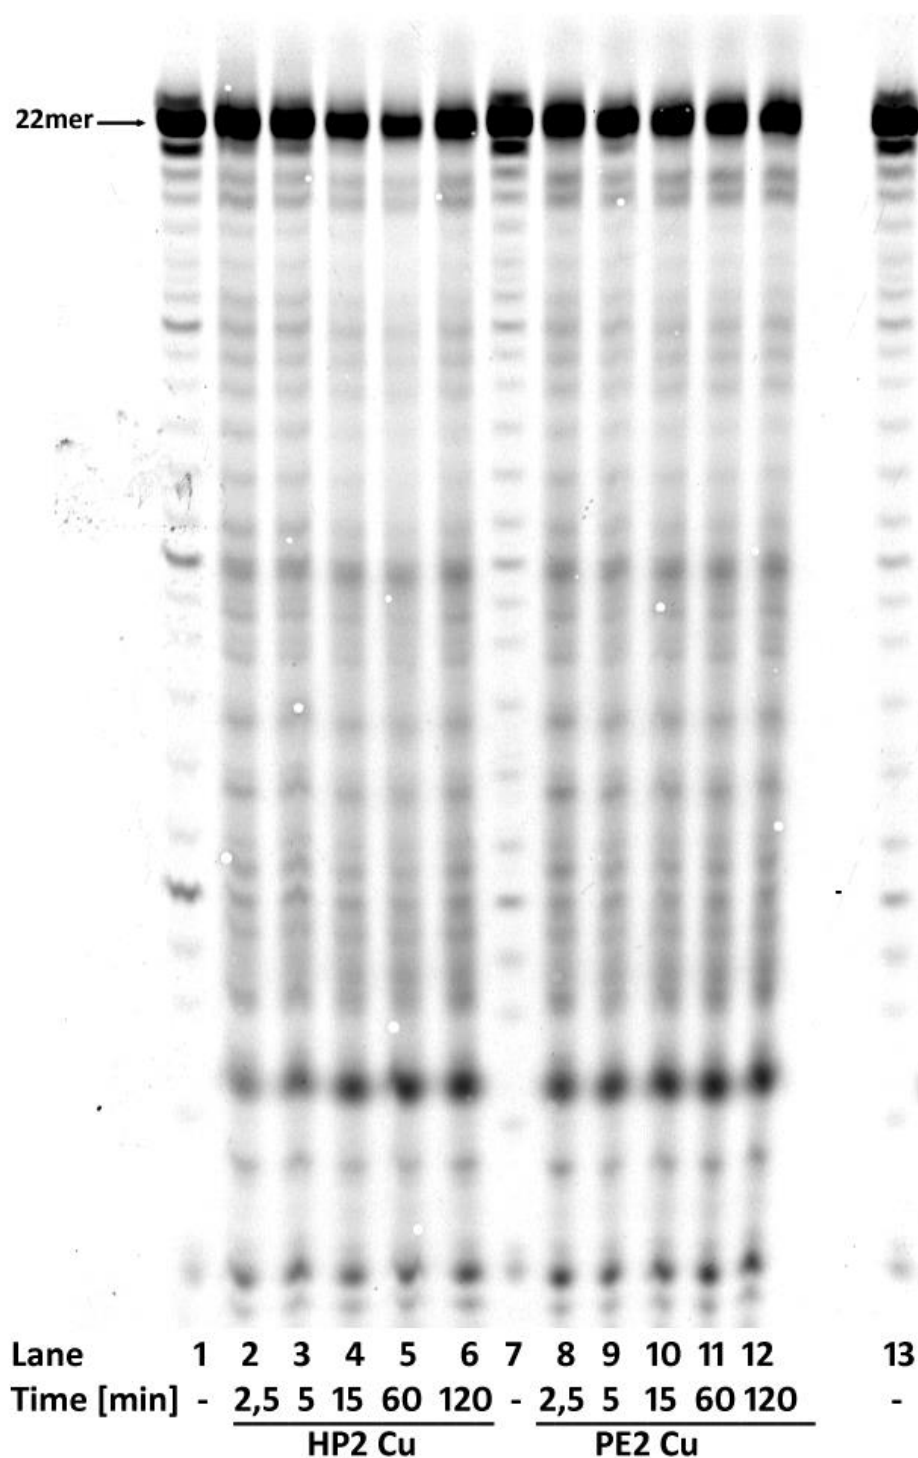

**Figure S4.** Denaturing polyacrylamide gel electrophoresis showing the oxidative cleavage of TERRA RNA-G4 (5  $\mu$ M) by Cu(II)-NDI ligands (10  $\mu$ M) in 10 mM TRIS-HCl buffer (pH 7.4), with 100 mM KCl. Lanes 1-7: **HP2Cu** + TERRA only (lane 1) or in the presence of sodium ascorbate (1 mM) and H<sub>2</sub>O<sub>2</sub> (1 mM) at different reaction times (lanes 2-6). Lanes 8-12: **PE2Cu** + TERRA only (lane 7) or in the presence of sodium ascorbate (1 mM) and H<sub>2</sub>O<sub>2</sub> (1 mM) at different reaction times (lanes 9-12). Lane 13: TERRA alone.

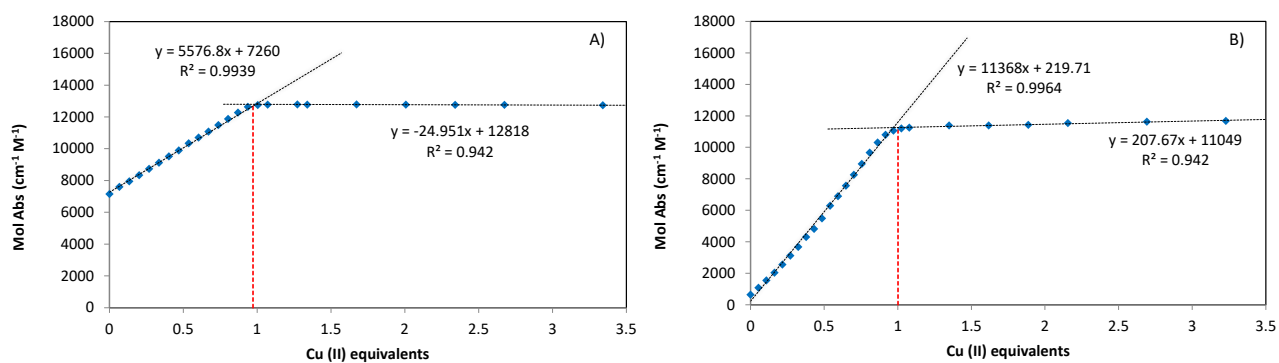

**Figure S5.** Molar absorption profiles at A) 555 nm for **HP2Cu** complexation and at B) 690 nm for **PE2Cu** complexation. On the graph are reported the equations of the interpolation lines used to derive the point of intersection.

## HPLC purity analysis

For HPLC analysis and characterization, the following method was used: flow 1.4 mL/min, isocratic gradient over 2 min 95% of H<sub>2</sub>O + 0.1% TFA (5% CH<sub>3</sub>CN), gradually to 40% aqueous solvent over 6 min, then isocratic flow for 4 min ( $\lambda$  = 256 nm).

**HP2** ( $t_R$  = 5.48 min; 96.6 %)

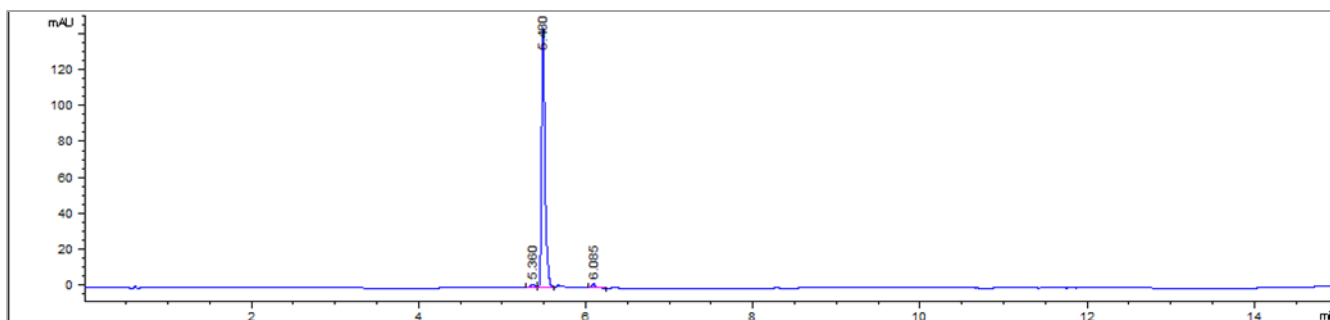

**PE2** ( $t_R$  = 4.77 min; 92.3 %)

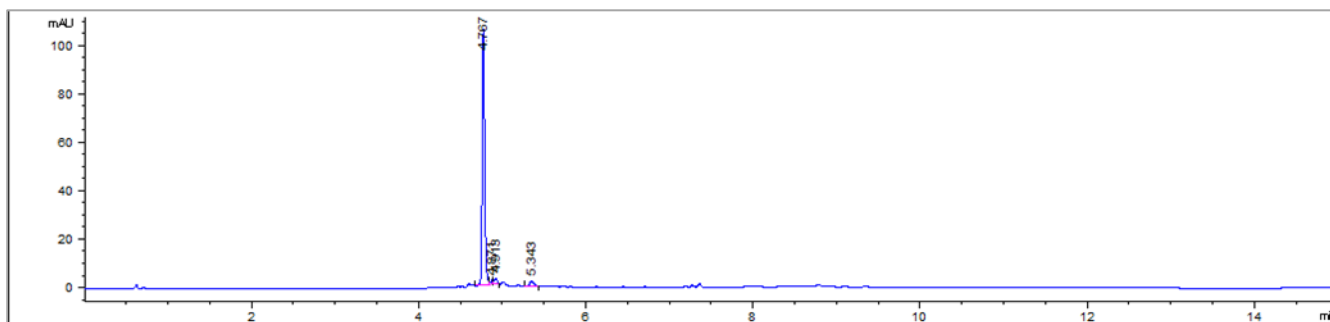

**Compound 5** ( $t_R$  = 5.16 min; 92.4 %)

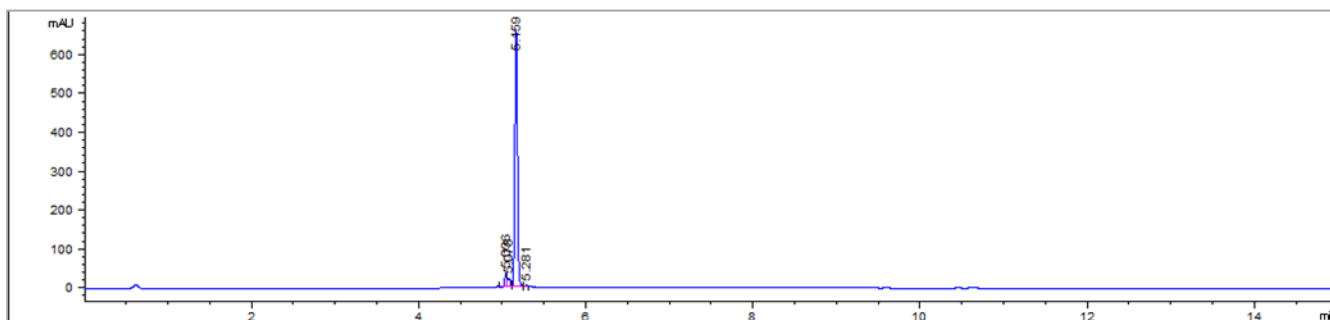

ESI-MS Data

HP2 (Mol. Wt.: 543.58 u.m.a.)

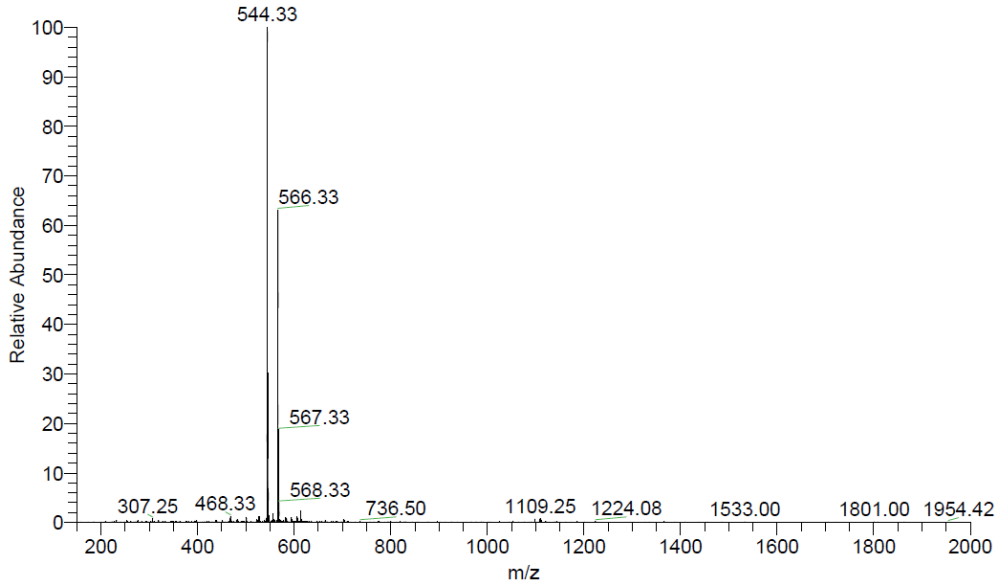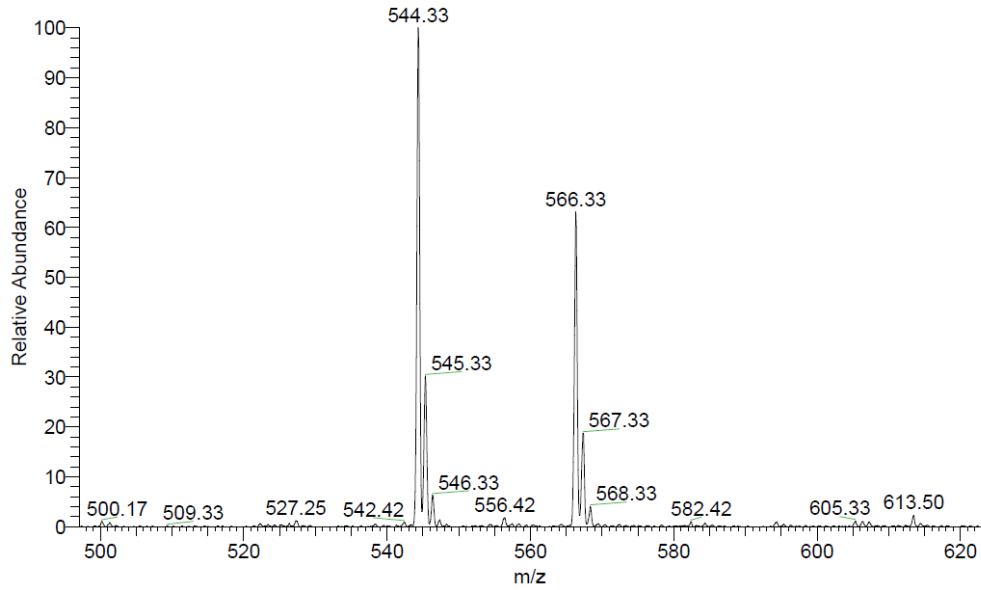

HP2Cu (Mol. Wt.:606.11)

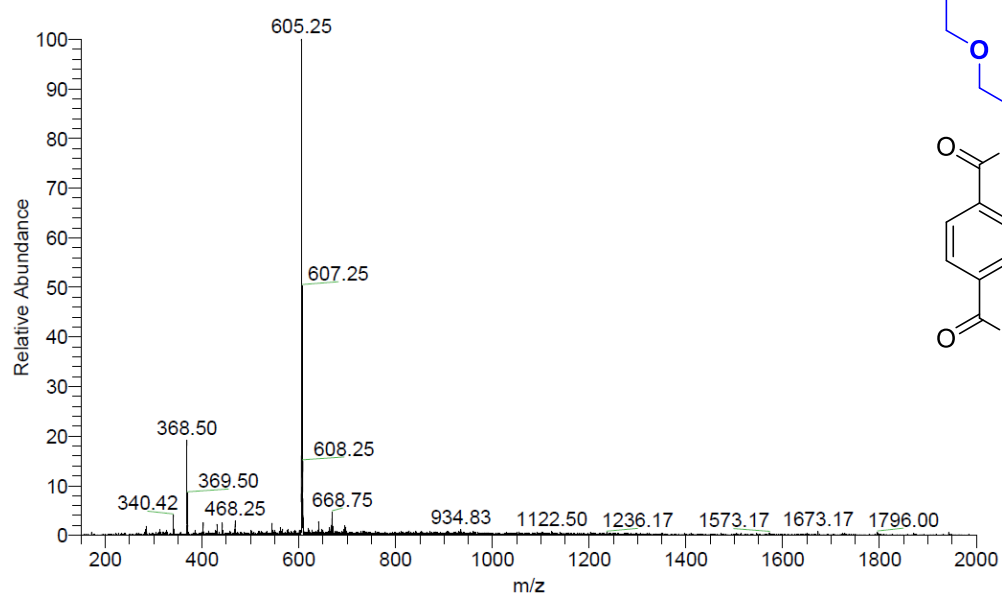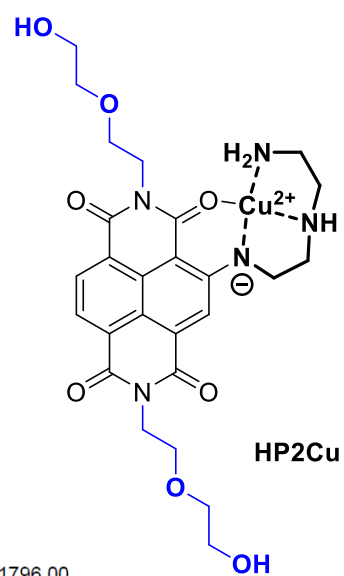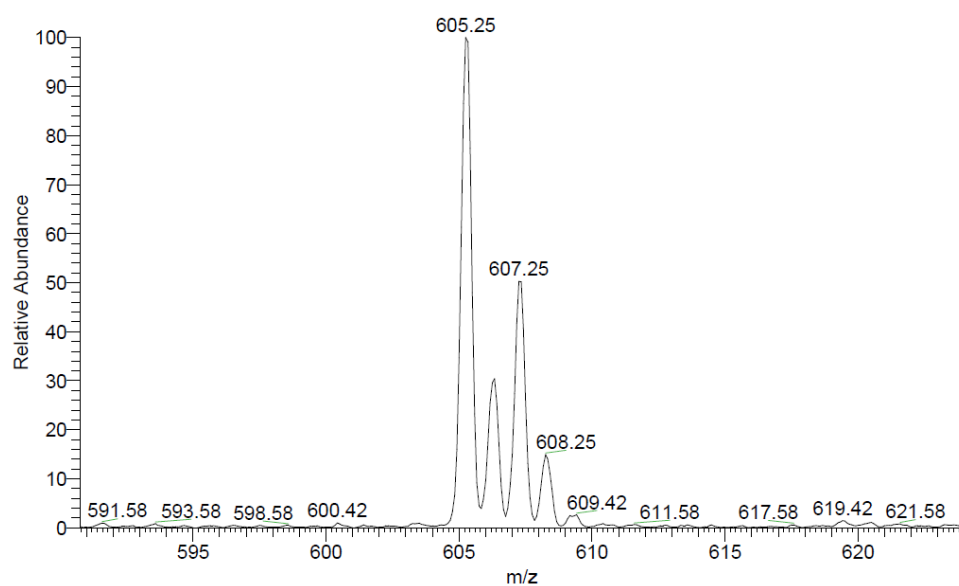



PE2 (Mol. Wt.: 612.73 u.m.a.)

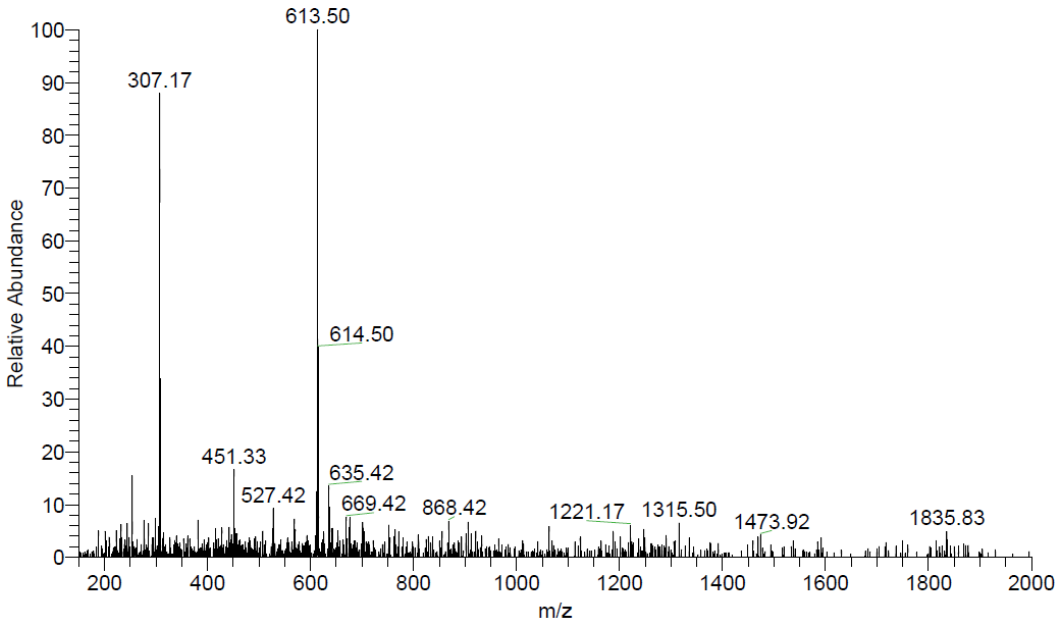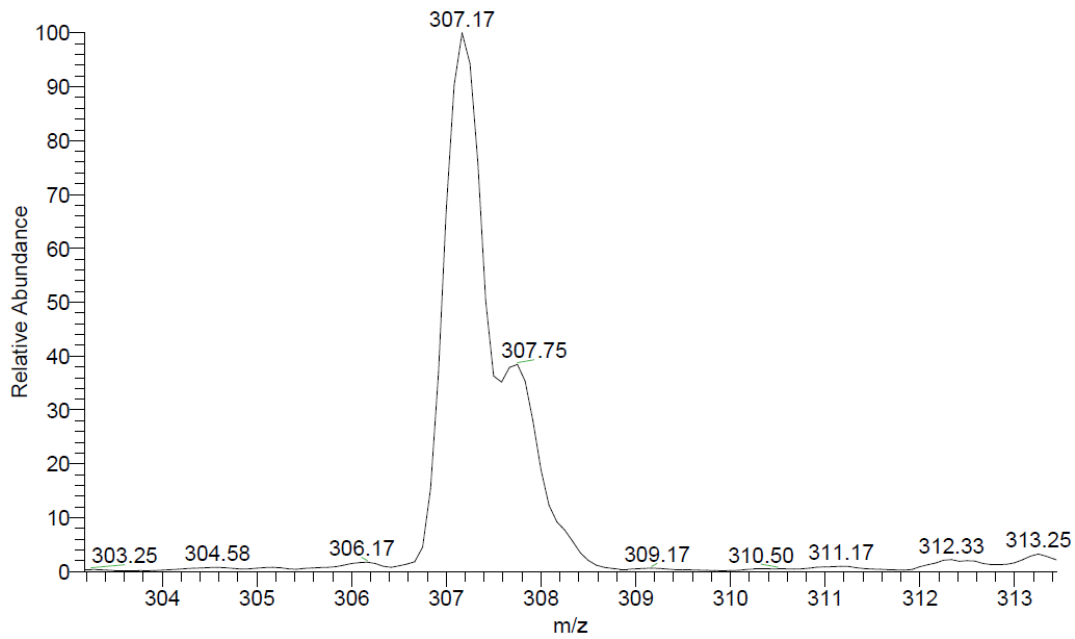

**PE2Cu** (Mol. Wt.: 675.27 u.m.a.)

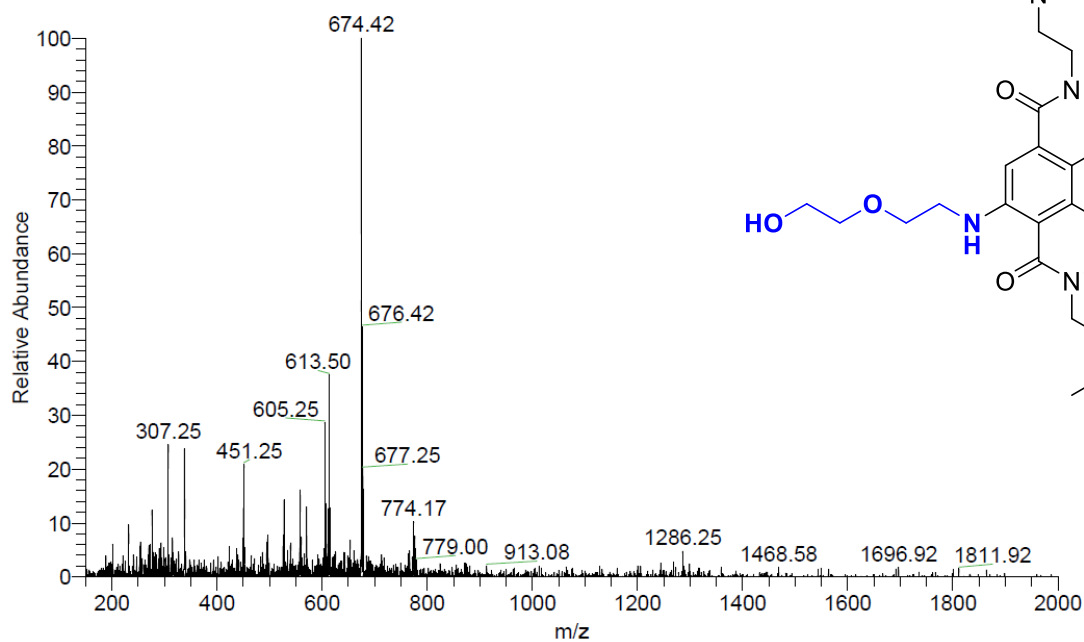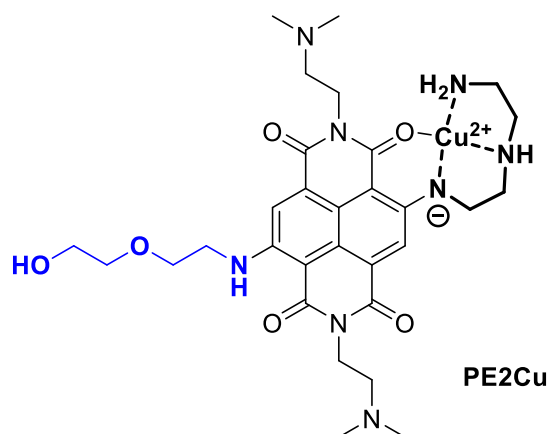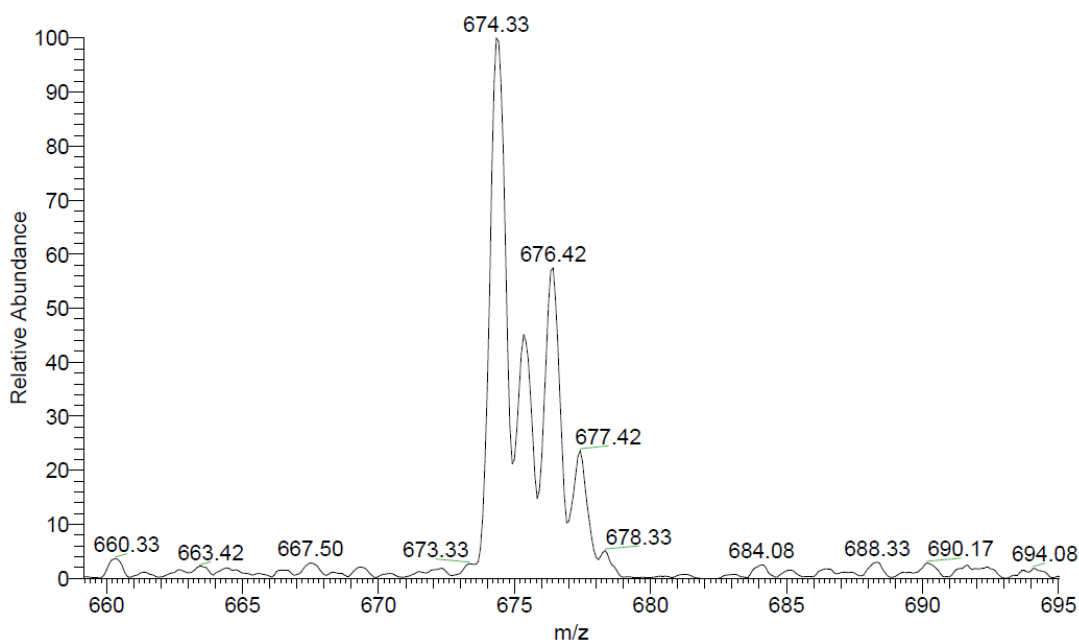

**Compound 5** (Mol. Wt.: 511.58 u.m.a.)

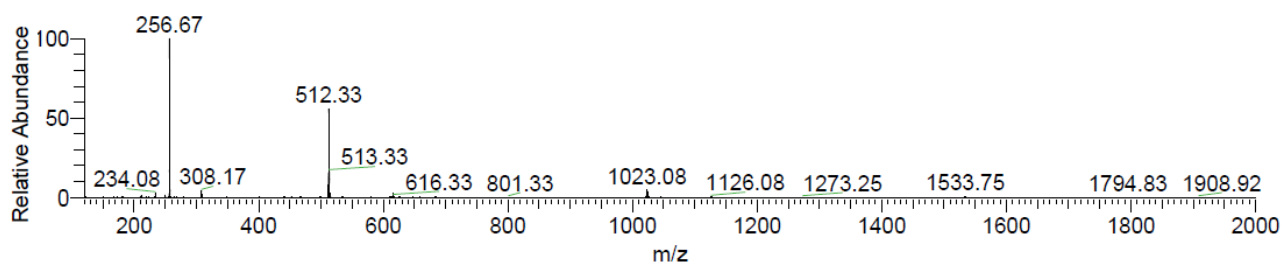

**$^1\text{H}$ -NMR and  $^{13}\text{C}$ -NMR Characterization**  
**HP2.  $^1\text{H}$ -NMR (300 MHz,  $\text{D}_2\text{O}$ )**

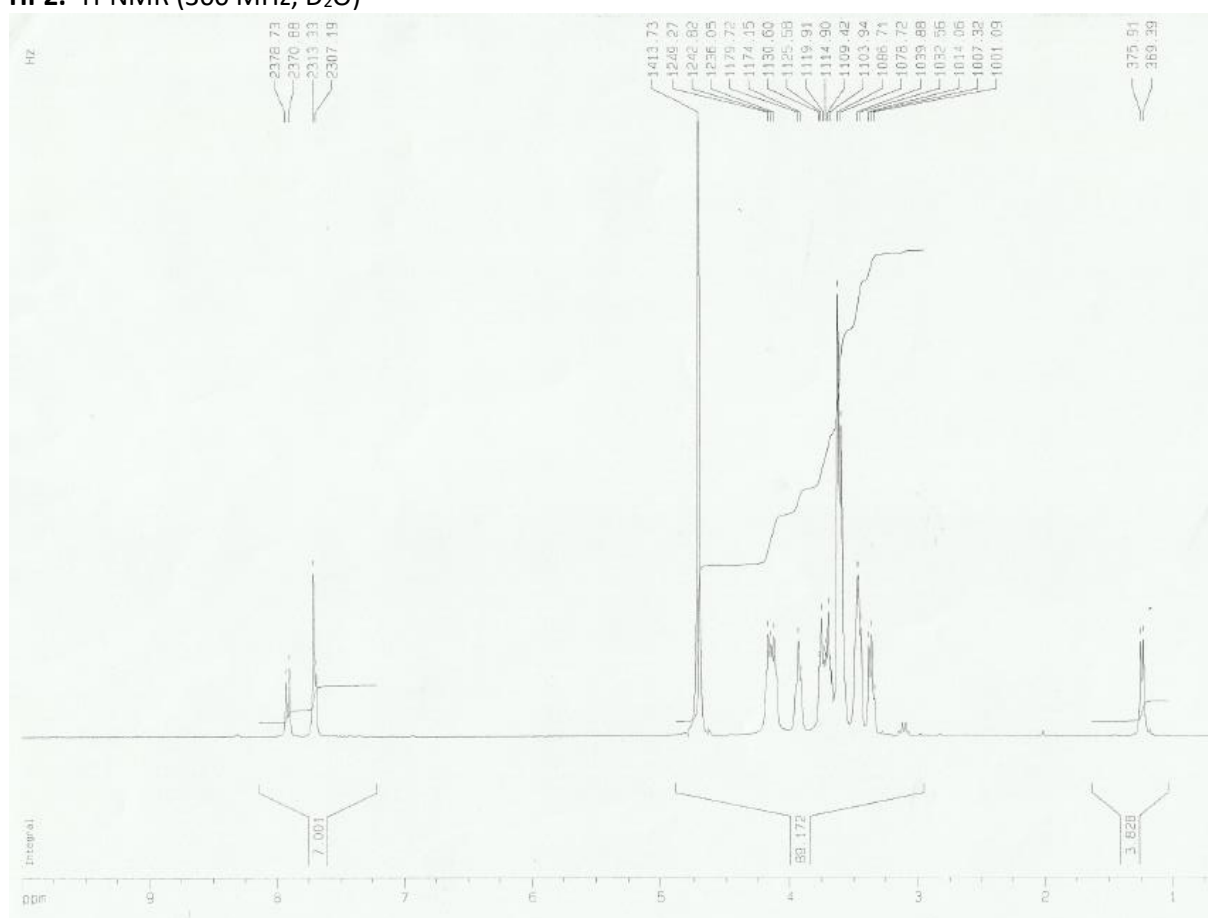

**HP2.  $^{13}\text{C}$ -NMR (75 MHz,  $\text{D}_2\text{O}$ )**

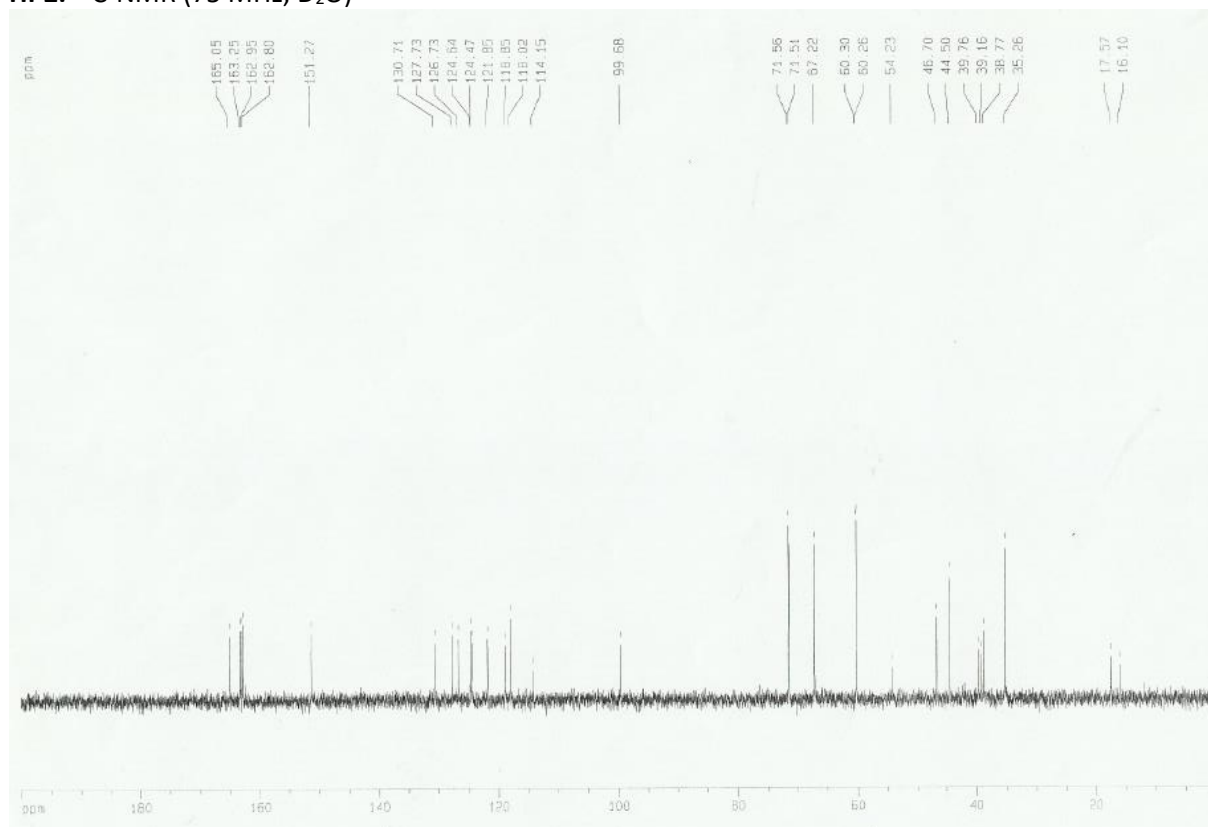

PE2.  $^1\text{H}$ -NMR (300 MHz,  $\text{D}_2\text{O}$ )

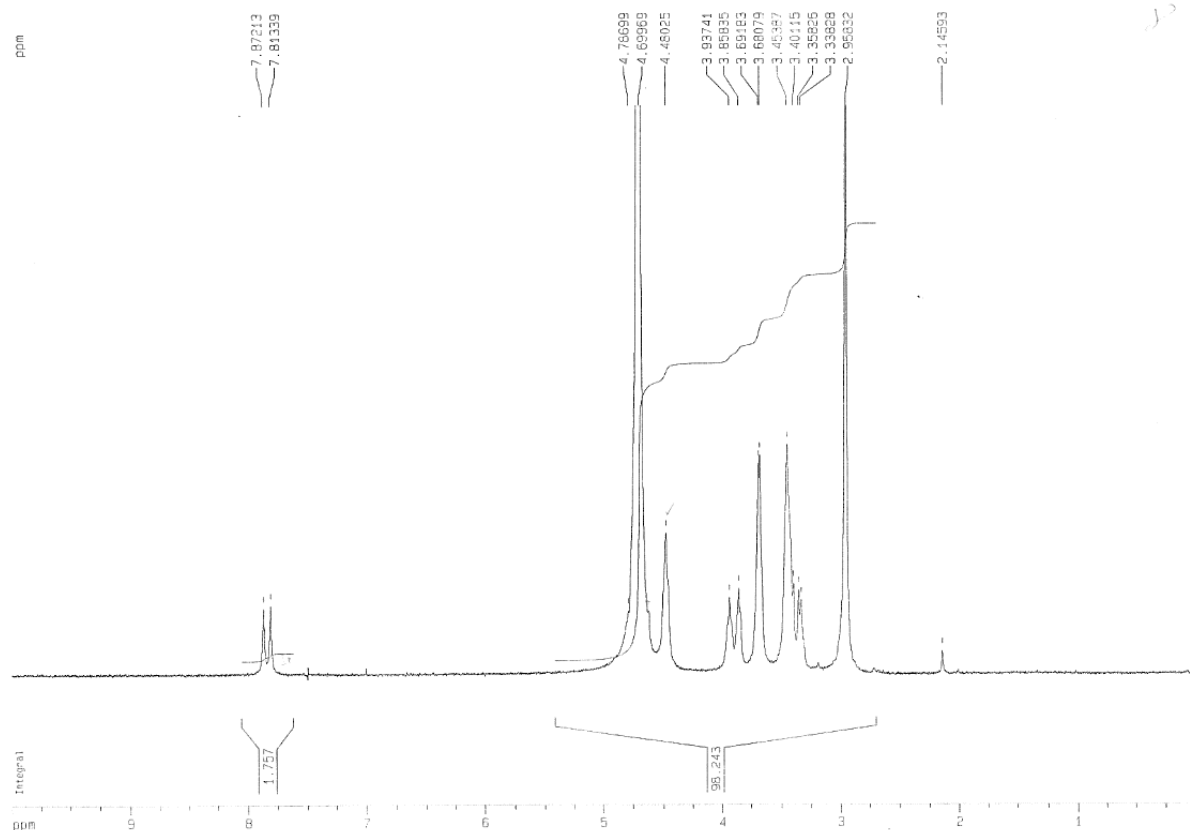

PE2.  $^{13}\text{C}$ -NMR (75 MHz,  $\text{D}_2\text{O}$ )

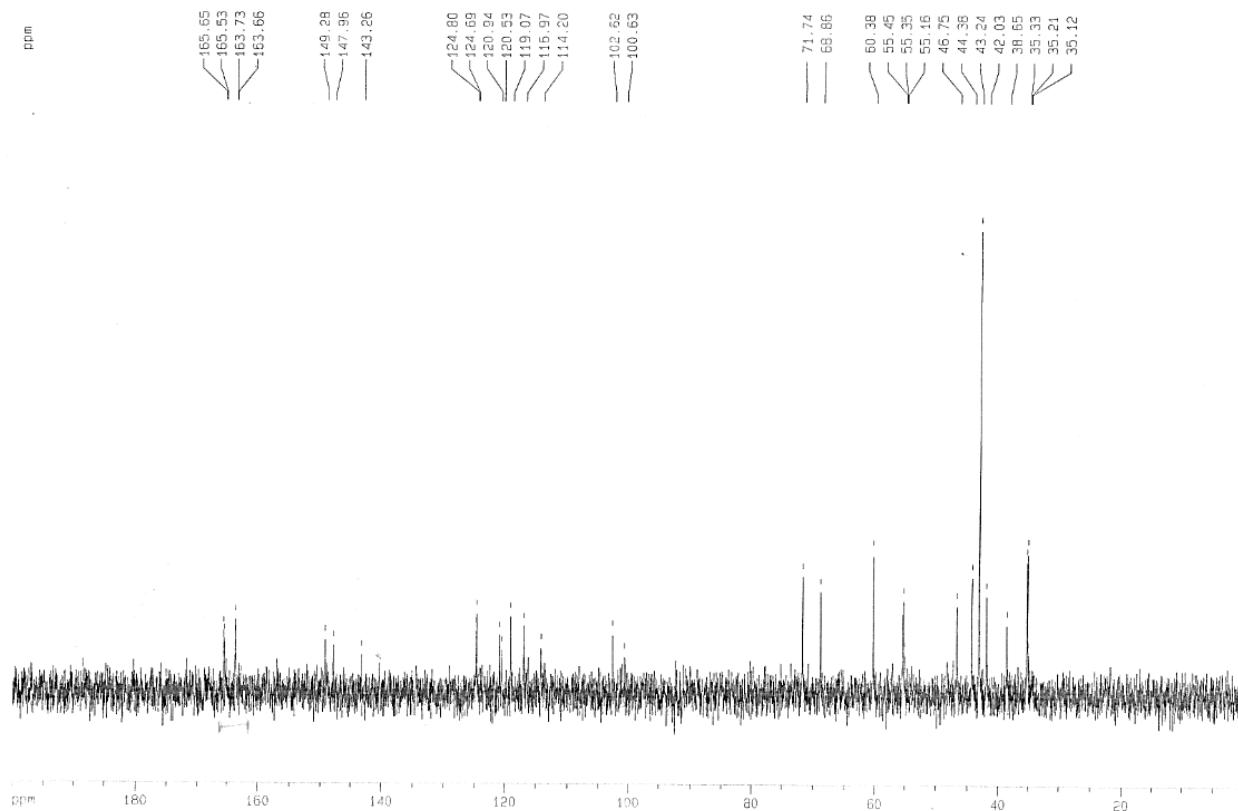

**Compound 5.  $^1\text{H}$ -NMR (300 MHz,  $\text{D}_2\text{O}$ )**

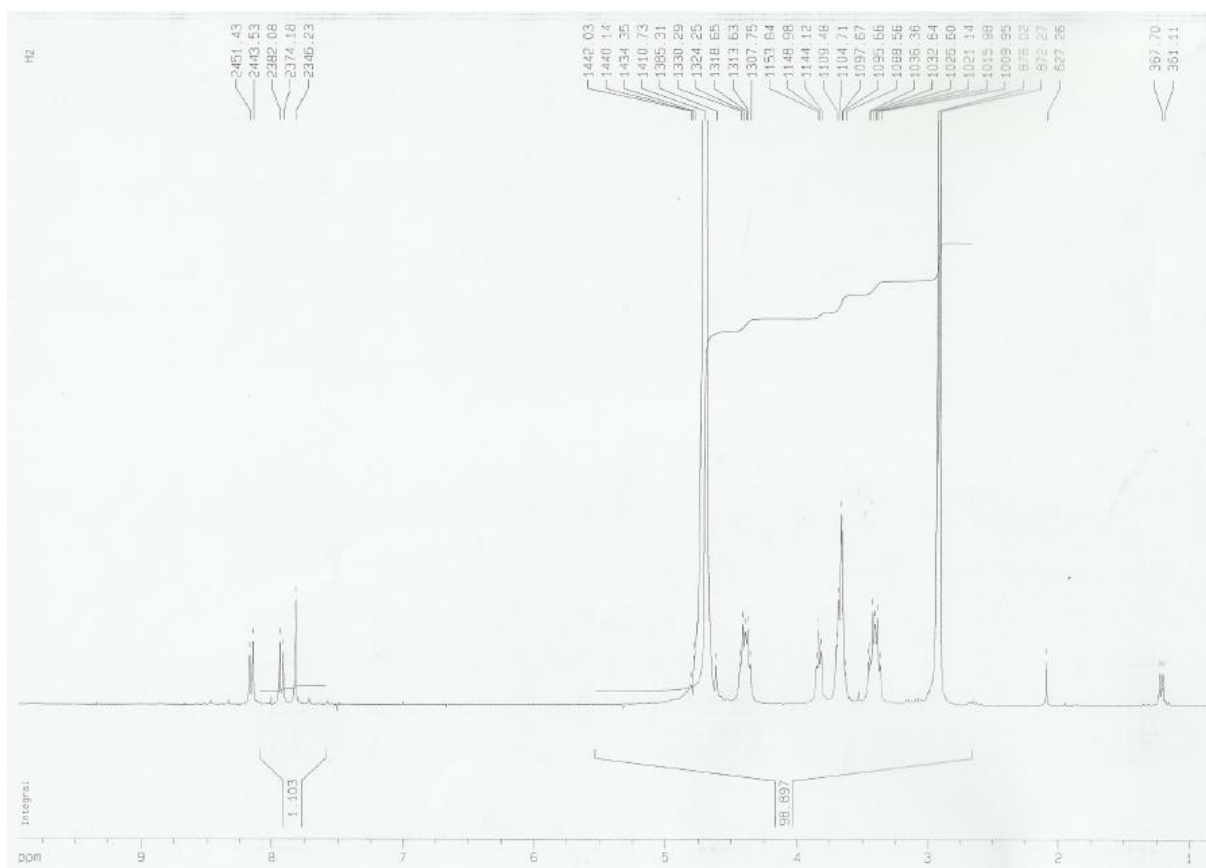

**Compound 5.  $^{13}\text{C}$ -NMR (75 MHz,  $\text{D}_2\text{O}$ )**

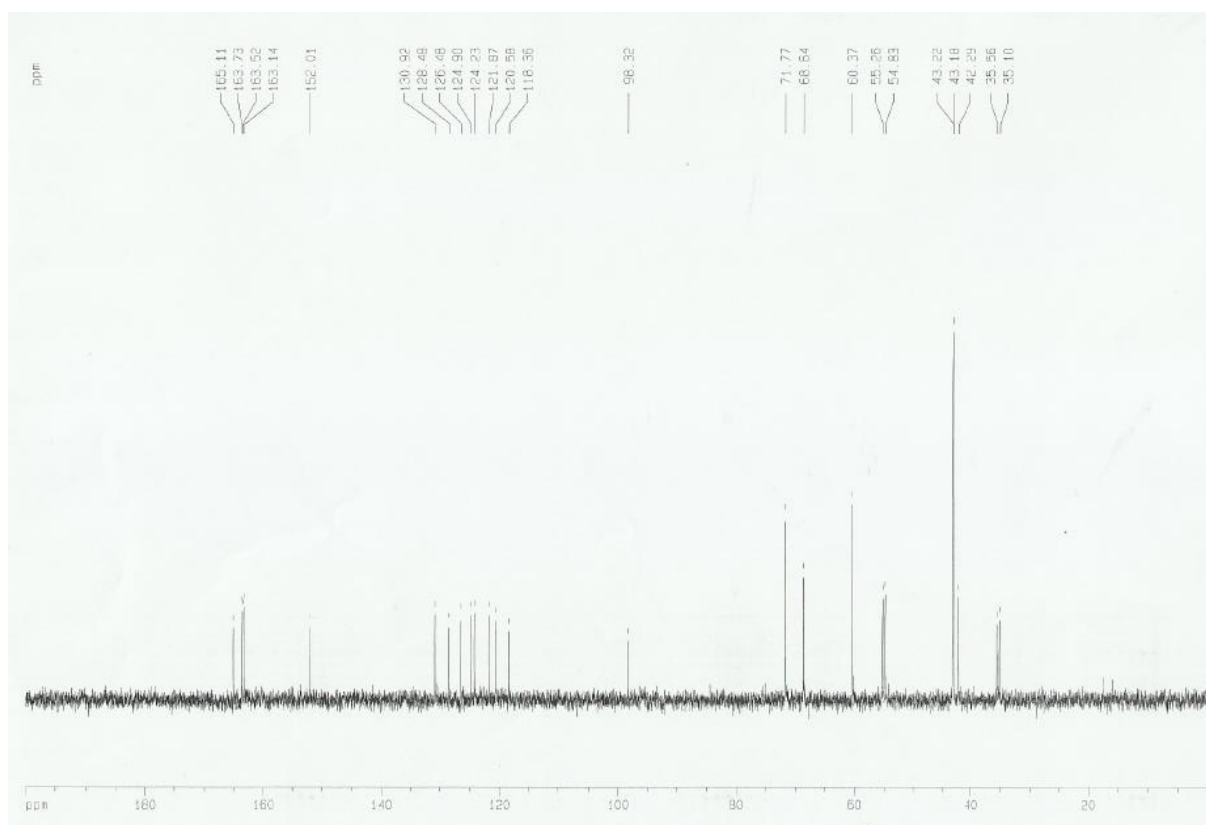

Supplement: s1 [file s1]
